# Supplementary material
Source: PubMed Central journal article supplement (PMC1959376)
Supplement: ppat.0030119.sg003.pdf [file ppat.0030119.sg003.pdf]

FigureS3

A

.....|.....|.....|.....|.....|.....|  
5 15 25 35 45 55  
AAGCTTATTA TCTTAATCTT TTAACTCTT ACTTTCTTAT ATACAGCCTT ACGTCCTAAC  
.....|.....|.....|.....|.....|.....|  
65 75 85 95 105 115  
TTAGGCAAAC ACGAAAGCGA ACCTAAAATA AAAAATATCA AAATTTTTC A TTTAATTTGT  
.....|.....|.....|.....|.....|.....|  
125 135 145 155 165 175  
GGCTTAACTT TAGGATTTTA TGATGGATTT TTAGGGCCTG GAACGGGTTC ATTTTGGATT  
.....|.....|.....|.....|.....|.....|  
185 195 205 215 225 235  
TTTGCTTGTG TGATGCTACT AGGTTTTAAT ATGAGAAAAG CAAGCATTAA TACTAAAATT  
.....|.....|.....|.....|.....|.....|  
245 255 265 275 285 295  
TTAAATTTCA CTAGTAATAT CATTGCTCTT GCTATATTTT TATGGCAATA CGAACTTTTA  
.....|.....|.....|.....|.....|.....|  
305 315 325 335 345 355  
TGGGCTGTAG GCTTGCTTAT GGGCGTAGGA CAAGTTT TAG GAGCTTATTT AGGCTCAAAA  
.....|.....|.....|.....|.....|.....|  
365 375 385 395 405 415  
CTTGTATTAA AACTAATGG AAAGTTTATA AAAACTTTAT TTTTAATCGT TGTAGGAGCT  
.....|.....|.....|.....|.....|.....|  
425 435 445 455 465 475  
ACTATCATT AAGTAGCTTG GGATTATTTT AGTTAAAAAT TGACCCCGA ACTAAGCTCC  
.....|.....|.....|.....|.....|.....|  
485 495 505 515 525 535  
CACATAGGTA AAAATATACC TAAAGCCAAA AACAAAAC TA AAAACGCTAC AAATAAAGTC  
.....|.....|.....|.....|.....|.....|  
545 555 565 575 585 595  
ATCATAGGCT CTAAAAAAAC CAAAAATCTA TCCATTAAAT TTCACTTTT TTGTTGATAA  
.....|.....|.....|.....|.....|.....|  
605 615 625 635 645 655  
TATTGGCAAT TCTTCACTAA CACTCAATGA CTTTTTACTT TCCGATCTAA GCGTAAATAT  
.....|.....|.....|.....|.....|.....|  
665 675 685 695 705 715  
CCCAATTATC CCAAATGTC CGTTTTGTCC CAAAAAAGTG ATCAAATGCT GTTTAAAAGG  
.....|.....|.....|.....|.....|.....|  
725 735 745 755 765 775  
CGGATAATAC GAGTTTAAAT TTTAATTTTT ATATCCCAA AGTGTTTTTA CTCTCTAGGA  
.....|.....|.....|.....|.....|.....|  
785 795 805 815 825 835  
TAGTTACATT TTTACTTAAA GTATCCTTAT GTTTTCTTAA TCATGTA ACT ATCCC

B

- Cj1468 [Campylobacter jejuni 11168] Expect = 0.0
- Cj1470c (C-Terminus) [Campylobacter jejuni 11168] Expect = 3e-65
- CJE0213 [Campylobacter jejuni RM1221] Expect = 3e-52
