# Supplementary material
Source: PubMed Central journal article supplement (PMC1959376)
Supplement: ppat.0030119.sg004.pdf [file ppat.0030119.sg004.pdf]

Figure S4

**A**

```

.....|.....| .....|.....| .....|.....| .....|.....| .....|.....|
   5      15      25      35      45      55
TTTATCAAAA TAAAGATATT GCAGAAAGCA GAAGAAAACT TGCATTAGAA ATAGAACAAA
-----

.....|.....| .....|.....| .....|.....| .....|.....| .....|.....|
   65      75      85      95     105     115
AAATACAGAA AGGATATCCT AAAGCCTATG GCTTAATTAT AGATATAATT CAGCTTTTGG
-----

.....|.....| .....|.....| .....|.....| .....|.....| .....|.....|
  125     135     145     155     165     175
AAGATAATTA TGATGTAAAT CTTTTTGAAA ATCAATGCAT TAAGTATTAT GAAGAAGCTC
-----

.....|.....| .....|.....| .....|.....| .....|.....| .....|.....|
  185     195     205     215     225     235
AAAAGTTAAA AACCATTAAA TCCAAGCAAA AAAGAATTGA TTATATAAAT GATTTAATAA
-----

.....|.....| .....|.....| .....|.....| .....|.....| .....|.....|
  245     255     265     275     285     295
AAGAAGCTGA AATAAATCCT AAAATGGATG AGAAATTTGT TAATTTTTGG AAAAATAAAG
-----

.....|.....| .....|.....| .....|.....| .....|.....| .....|.....|
  305     315     325     335     345     355
TAAAAGAAAT ACAATAATTA CATTTTAAGT CTAAGGCTTG TAGAAAAATA AAATGCAACC
-----

.....|.....| .....|.....| .....|.....| .....|.....| .....|.....|
  365     375     385     395     405     415
AAAAAGTATG ATTTTATTTT TCTATGGCTA CCTTTTATTT TTCCGCCGAC ATCTACGATA
-----

.....|.....| .....|.....| .....|.....| .....|.....| .....|.....|
  425     435     445     455     465     475
ATAAAAACCA ATCCCCCTAA AAGTTCACCT TTATTTTTAA GATAAATACC AAATTTACTC
-----

.....|.....| .....|...
  485     495
CCTATCCTTA GAGCAAT
-----

```

**B**

————— **ORF 0656 [Campylobacter jejuni CF93-6] Expect = 7e-52**  
————— **Cj0167c (N-terminus) [Campylobacter jejuni 11168] Expect = 1e-6**
