# Supplementary material
Source: PubMed Central journal article supplement (PMC1959376)
Supplement: ppat.0030119.sg005.pdf [file ppat.0030119.sg005.pdf]

Figure S5

**A**

```
.....|.....| .....|.....| .....|.....| .....|.....| .....|.....| .....|.....|
      5          15          25          35          45          55
AAGCTTTAGC TACTTTAAGA ATGAAATTTT CAATCGAAAA ATAAATGTTC TATTAGAATT
.....|.....| .....|.....| .....|.....| .....|.....| .....|.....| .....|.....|
      65          75          85          95          105         115
TTTACTCCTA GTGTAAGGGG TATTTTAAAA AGAACATGTA TCCAAATAAT AGGATTTTAA
.....|.....| .....|.....| .....|.....| .....|.....| .....|.....| .....|.....|
     125         135         145         155         165         175
AGCATATAAA AATGACTTTT TATCTTTCCC GATCTAAAGC GTAAAATATC CCAATTATCC
.....|.....| .....|.....| .....|.....| .....|.....| .....|.....| .....|.....|
     185         195         205         215         225         235
CAAATGTCC GTTTTGTCCC AAAAAAGTGA TCAAATGCTG TTTAAAAGGC GGATAAATAC
.....|.....| .....|.....| .....|.....| .....|.....| .....|.....| .....|.....|
     245         255         265         275         285         295
GAGTTTTAAT TTTAATTTTT ATATCCCAA AGTGTTTTTA CTCTCTAGGA TAGTTACATT
.....|.....| .....|.....| .....|.....| .....|.....| .....|.....| .....|.....|
     305         315         325         335
TTTACTTAAA GTATCCTTAT GTTTCTTAA TCATGTA ACT A
```

**B**

-  **miaA [Campylobacter jejuni 11168] Expect = 2e-17**
-  **Cj0167c (C-Terminus) [Campylobacter jejuni 11168] Expect = 9e-17**
-  **CJE0213 [Campylobacter jejuni RM1221] Expect = 4e-62**
