# Supplementary material
Source: PubMed Central journal article supplement (PMC1959376)
Supplement: ppat.0030119.sg006.pdf [file ppat.0030119.sg006.pdf]

Figure S6

**A**

.....|.....| .....|.....| .....|.....| .....|.....| .....|.....|  
5 15 25 35 45 55  
TTATCAAAAT AAAGATATTG CAGAAAGCAG AAGAAAACCTT GCATTAGAAA TAGAACAAAA  
.....|.....| .....|.....| .....|.....| .....|.....| .....|.....|  
65 75 85 95 105 115  
AATACAGAAA GGATATCCTA AAGCCTATGG CTTAATTATA GATATAATTC AGCTTTTGGA  
.....|.....| .....|.....| .....|.....| .....|.....| .....|.....|  
125 135 145 155 165 175  
AGATAATTAT GATGTAAATC TTTTGTGAAA TCAATGCATT AAGTATTATG AAGAAGCTCA  
.....|.....| .....|.....| .....|.....| .....|.....| .....|.....|  
185 195 205 215 225 235  
AAAGTTAAAA ACCATTAAAT CCAAGCAAAA AAGAATTGAT TATATAAATG ATTTAATAAA  
.....|.....| .....|.....| .....|.....| .....|.....| .....|.....|  
245 255 265 275 285 295  
AGAAGCTGAA ATAAATCCTA AAATCGATGA GAAATTTGTT AATTTTTTGA AAAATAAAGT  
.....|.....| .....|.....| .....|.....| .....|.....| .....|.....|  
305 315 325 335 345 355  
AAAAGAAATA CAATAATTAC ATTTTAAGTT TAAGGTTTGT AGAAAAATAA AATGCAACCA  
.....|.....| .....|.....| .....|.....| .....|.....| .....|.....|  
365 375 385 395 405 415  
AAAAGTATCA TTTTATTTTT CTATGGTTAC ATTTTCATTTT TCCGCCGATA TCTTCCACTT  
.....|.....| .....|.....| .....|.....| .....|.....| .....|.....|  
425 435 445 455 465 475  
TTCATCGCCA CACTGAGCAT AGAAATTACC AAAGAATCAA AAATGTCGAT CATTTTGAAA  
.....|.....| .....|.....| .....|.....| .....|.....| .....|.....|  
485 495 505 515 525 535  
GCCTTTCTTA GCTCAAAAAC AGAACCAATT AAATAATAA GTCTTTTATC TGATAAATTA  
.....|.....| .....|.....| .....|. .  
545 555 565  
CAATTTCTTT CTCCCGGCTC GCAATA

**B**

————— ORF 0656 [Campylobacter jejuni CF93-6] Expect = 7e-52  
————— Cj1470c (N-terminus) [Campylobacter jejuni 11168] Expect = 4e-06
