# Supplementary material
Source: PubMed Central journal article supplement (PMC1959376)
Supplement: ppat.0030119.sg008.pdf [file ppat.0030119.sg008.pdf]

Figure S8

**A**

```

.....|.....| .....|.....| .....|.....| .....|.....|
   5      15      25      35      45      55
TGAAATCCCT TGTTGCAAGG TGGAATTTAC TTCCTCCGCC AATTTAAAAG AAGGAGAATA

.....|.....| .....|.....| .....|.....| .....|.....|
  65      75      85      95     105     115
ACAGGTTTAA TAAAGTACCT CAAGTAATTG AACAAGCCAA TTGTTTTATA GATGGGTATG

.....|.....| .....|.....| .....|.....| .....|.....|
 125     135     145     155     165     175
GTTATGCTGG GGTAGCAAGA GATATCACTT TGCCTATTAT AGAACAAGAA GTATTAGAAA

.....|.....| .....|.....| .....|.....| .....|.....|
 185     195     205     215     225     235
GCAAAGGAGC GCTGAGTGCA AATTATGGCT CGGGTGGATT TAAAGCAATG CAATGCTCTT

.....|.....| .....|.....| .....|.....| .....|.....|
 245     255     265     275     285     295
TTAACATTAG CGACATGGGA GAACAAGCTT TTGAAGCTTT TGGAGTAAAT ACTTTTCTA

.....|.....| .....|.....| .....|.....| .....|.....|
 305     315     325     335     345     355
AAACAAAAT  CCCACTTGTT TTAAAGCAA GTATTCATCA AAGCGGATCA GGAAAACAAG

.....|.....| .....|.....| .....|.....| .....|.....|
 365     375     385     395     405     415
TGCCTTTTGT AGTGGAGTTA AATGGAGAAT TTACATCTAT GACTCCCCCT TCTTTTGCAA

.....|.....| .....|.....| .....|.....| .....|.....|
 425     435     445     455     465     475
CAGGTGGCGA ATTTACAAGT GAAACAAAAA CCCATGCGCC TTTTATAAAA ATCACCCCTGG

.....|.....| .....|.....| .....|.....| .....|.....|
 485     495     505     515     525     535
ATGGCAAAG  ACTATTTTTA GCTGATATAA AATACCCTAT TCTAGACTTT AATGGCATTG

.....|.....| .....|.....| .....|.....|
 545     555     565     575
ATCAAATGGC CAACGTAAAA GCCAATTTC GCCTATAAGG

```

**B**

————— **Phage major tail tube protein [Campylobacter jejuni 260.94] Expect = 8e-25**
