# Supplementary material
Source: PubMed Central journal article supplement (PMC1959376)
Supplement: ppat.0030119.st001.pdf [file ppat.0030119.st001.pdf]

| Primer     | Sequence (5' → 3')                | Location / Use             |
|------------|-----------------------------------|----------------------------|
| CjE0215 F  | AAA GGA TAT ACT TGC GAG TG        | Mu-Like Prophage Gene      |
| CjE0215 R  | AGT TCT CCA ATT ACT ACA CC        | Mu-Like Prophage Gene      |
| CjE0222 F  | TCT TGC TTT CTT AAA GCG TC        | Mu-Like Prophage Gene      |
| CjE0222 R  | GGT GTT ATT TTA GGA CTA GC        | Mu-Like Prophage Gene      |
| CjE0225 F  | AAA TCT TTA AGA GCG TOC TG        | Mu-Like Prophage Gene      |
| CjE0225 R  | CAA ACT TGA AAA TGG CGA AG        | Mu-Like Prophage Gene      |
| CjE0231 F  | OCT CAA TAT TTG GCT TAT CC        | Mu-Like Prophage Gene      |
| CjE0231 R  | TTT ATT GCT GCA AGA GCA AG        | Mu-Like Prophage Gene      |
| CjE0233 F  | GCT AGG TTC TAT GTT TGT AG        | Mu-Like Prophage Gene      |
| CjE0237 R  | CTC TTT AAC CAC ATC AAC AC        | Mu-Like Prophage Gene      |
| CjE0241 F  | TAT GGA TAA GTC CAT CTT GC        | Mu-Like Prophage Gene      |
| CjE0241 R  | TGA ATT GCC TCA AAA TGT GC        | Mu-Like Prophage Gene      |
| CjE0244 F  | GGA AAA TGA TGC CTT AAT GG        | Mu-Like Prophage Gene      |
| CjE0244 R  | TAA ATC CTT GCA AGC ATA GG        | Mu-Like Prophage Gene      |
| CjE0250 F  | TGC TTA AAA TCA GCG AGA AC        | Mu-Like Prophage Gene      |
| CjE0250 R  | AAA CTC GCT TTG CTC TAA AC        | Mu-Like Prophage Gene      |
| CjE0259 F  | AGT TTG GCT AGG AAT TTG AG        | Mu-Like Prophage Gene      |
| CjE0259 R  | GGT ATT AGT GAA GTT CAA GC        | Mu-Like Prophage Gene      |
| CjE0270 F  | AAA GCT TCC ATG TCA AAC TC        | Mu-Like Prophage Gene      |
| CjE0270 R  | GCT TTT AAT GTA AGC ACA GG        | Mu-Like Prophage Gene      |
| CjE0270 F2 | OCT TTA ATC ATA TCA GGC TTA CC    | CjE0270-End Sequencing     |
| CjE0270 F3 | CGG TAG TAA TAA TTT CAC TC        | CjE0270-End Sequencing     |
| CjE0270 F4 | GCT GGA TAT GGT GCA ATA AAT AGC   | CjE0270-End Sequencing     |
| CjE0213i F | GCA AAA ATC CCA AAT AAT AGG       | CjE0213-End Inverse PCR    |
| CjE0213i R | TTT AGG GAT AGT TAC ATG TTC       | CjE0213-End Inverse PCR    |
| CjE0227i F | ATT CAT AGA ACT TGC CAC AC        | Partial Copy Inverse PCR   |
| CjE0227i R | CAG CTA TTG TGG ATC TTT AC        | Partial Copy Inverse PCR   |
| CjE0241i F | GCT ATT TTT GAA GGA CTT AAA AAC C | Partial Copy Inverse PCR   |
| CjE0241i R | GTT CTA ATT GCT CTT TGT GG        | Partial Copy Inverse PCR   |
| CjE0270i F | CAA ATT GCA GAA GAA AAG CG        | CjE0270-End Inverse PCR    |
| CjE0270i R | GCT TCT GCA TAG TCA TCT GG        | CjE0270-End Inverse PCR    |
| Cj1468 F   | AGA TTC TAT TGT AGG TGG AG        | CjE0213 Adjacent Sequence  |
| Cj1468 R   | TAA TAG TAG CTC CTA CAA CG        | CjE0213 Adjacent Sequence  |
| Cj0166 F   | AGT GCT ATT TTT CCA AGT GC        | CjE0213 Adjacent Sequence  |
| Cj0166 R   | TOC TCT ATG ATT GTA GCA TC        | CjE0213 Adjacent Sequence  |
| 227 Unk F  | AGG CTG AAA TTG GCT TTT ACG       | CjE0227 Adjacent Sequence  |
| 227 Unk R  | CTT TCT CAC AGA GAG TGC AAA G     | CjE0227 Adjacent Sequence  |
| 241 Unk F  | CTT CTT CTC CTT CTG GTT TTG       | CjE0241 Adjacent Sequence  |
| 241 Unk R  | OCT AAA ATG CTA GCT CTT AG        | CjE0241 Adjacent Sequence  |
| Cj0167 F   | GAG CAA TGA TAC ATA AAA TGA AGG   | CjE0270 Adjacent Sequence  |
| Cj0167 R   | ATG CTT TTG CTG TAT CAC TAT GC    | CjE0270 Adjacent Sequence  |
| CtsF F     | CAT CGC AAC ACT GAG CAT AG        | CjE0270 Adjacent Sequence  |
| CtsF R     | AGA GCT AGC TTT GTT GTG TG        | CjE0270 Adjacent Sequence  |
| Cj0752 F   | AGC AAG GAT TAA TCT TCT CG        | Gene Adjacent to SmaI Site |
| Cj0752 R   | AGC TAA TTC GAA AGG CTT TG        | Gene Adjacent to SmaI Site |
| WlaH F     | TTT CTC TGT TGT AAC ATG GC        | Gene Adjacent to SmaI Site |
| WlaH R     | AGC TTT AGT GCT TTT AGT GC        | Gene Adjacent to SmaI Site |
| Cj0030 F   | AAA AGC GTA GAA ACA GAA GC        | Gene Adjacent to SmaI Site |
| Cj0030 R   | OCT TTA TAT GCT TCC TGT ATA GG    | Gene Adjacent to SmaI Site |
| AnsA F     | TTG CTA TTT TAG GAA CAG GC        | Gene Adjacent to SmaI Site |
| AnsA R     | TTC ATC TGA ATC ACT CAC AG        | Gene Adjacent to SmaI Site |
| RibD F     | ACA AGG TAG GCA AAT GAA AG        | Gene Adjacent to SmaI Site |
| RibD R     | AAT GCC ATA AGT ATC ACT CC        | Gene Adjacent to SmaI Site |
| Cj1621 F   | ACT TTT TGT TGC AGG AGT AG        | Gene Adjacent to SmaI Site |
| Cj1621 R   | TAG GTG CGA TAT TGG TAT TG        | Gene Adjacent to SmaI Site |
| Cj1505 F   | TTG CTT TAC CAA AAA GCT CG        | Gene Adjacent to SmaI Site |
| Cj1505 R   | GAT TGT CGC AAT CTA TCT TG        | Gene Adjacent to SmaI Site |
| SelD F     | AAA AGT OCT CCT GAA GTT TG        | Gene Adjacent to SmaI Site |
| SelD R     | AAC TOC TGC TTT ACT TAG TG        | Gene Adjacent to SmaI Site |
| MCPv F     | TAC ACA ACA GCC AAA ATA GC        | Gene Adjacent to SmaI Site |
| MCPv R     | AAC GAT GAG GGT ATT ATT GC        | Gene Adjacent to SmaI Site |
| Cj0268 F   | TTT AGG CTG TTT GCG ATT TC        | Gene Adjacent to SmaI Site |
| Cj0268 R   | GGT TTT GGA AAA TTC TCT CC        | Gene Adjacent to SmaI Site |
| Cj0431 F   | AGA CAA TCT ACT AGA AGG TG        | Gene Adjacent to SmaI Site |
| Cj0431 R   | GCT ATA TTT TAG AGC ACT CG        | Gene Adjacent to SmaI Site |
| MurD F     | TTA AAG ACT TTT CCA CGC TC        | Gene Adjacent to SmaI Site |
| MurD R     | TTT GGA TAC GGA AAA ACC AC        | Gene Adjacent to SmaI Site |
| Cj0742 F   | ATT TTC ACA TGC TGA AGA GC        | Gene Adjacent to SmaI Site |
| Cj0742 R   | ATA CCC ATT GCA TCC ATA AG        | Gene Adjacent to SmaI Site |
| 16S F      | TTA TGG AGA GTT TGA TCC TG        | 16S rRNA Gene              |
| 16S R      | TTA CCT TGT TAC GAC TTC AC        | 16S rRNA Gene              |

Supporting Table 1

Table indicating the PCR primers used during this study and their primary functions. All primers are designed and named based on the *C. jejuni* NCTC11168 or RM1221 genes they are located within.

Primers used for MLST analysis (not shown here) were according to Dingle *et al.* (2001).
