# Supplementary material
Source: PubMed Central journal article supplement (PMC1959376)

Figure S1

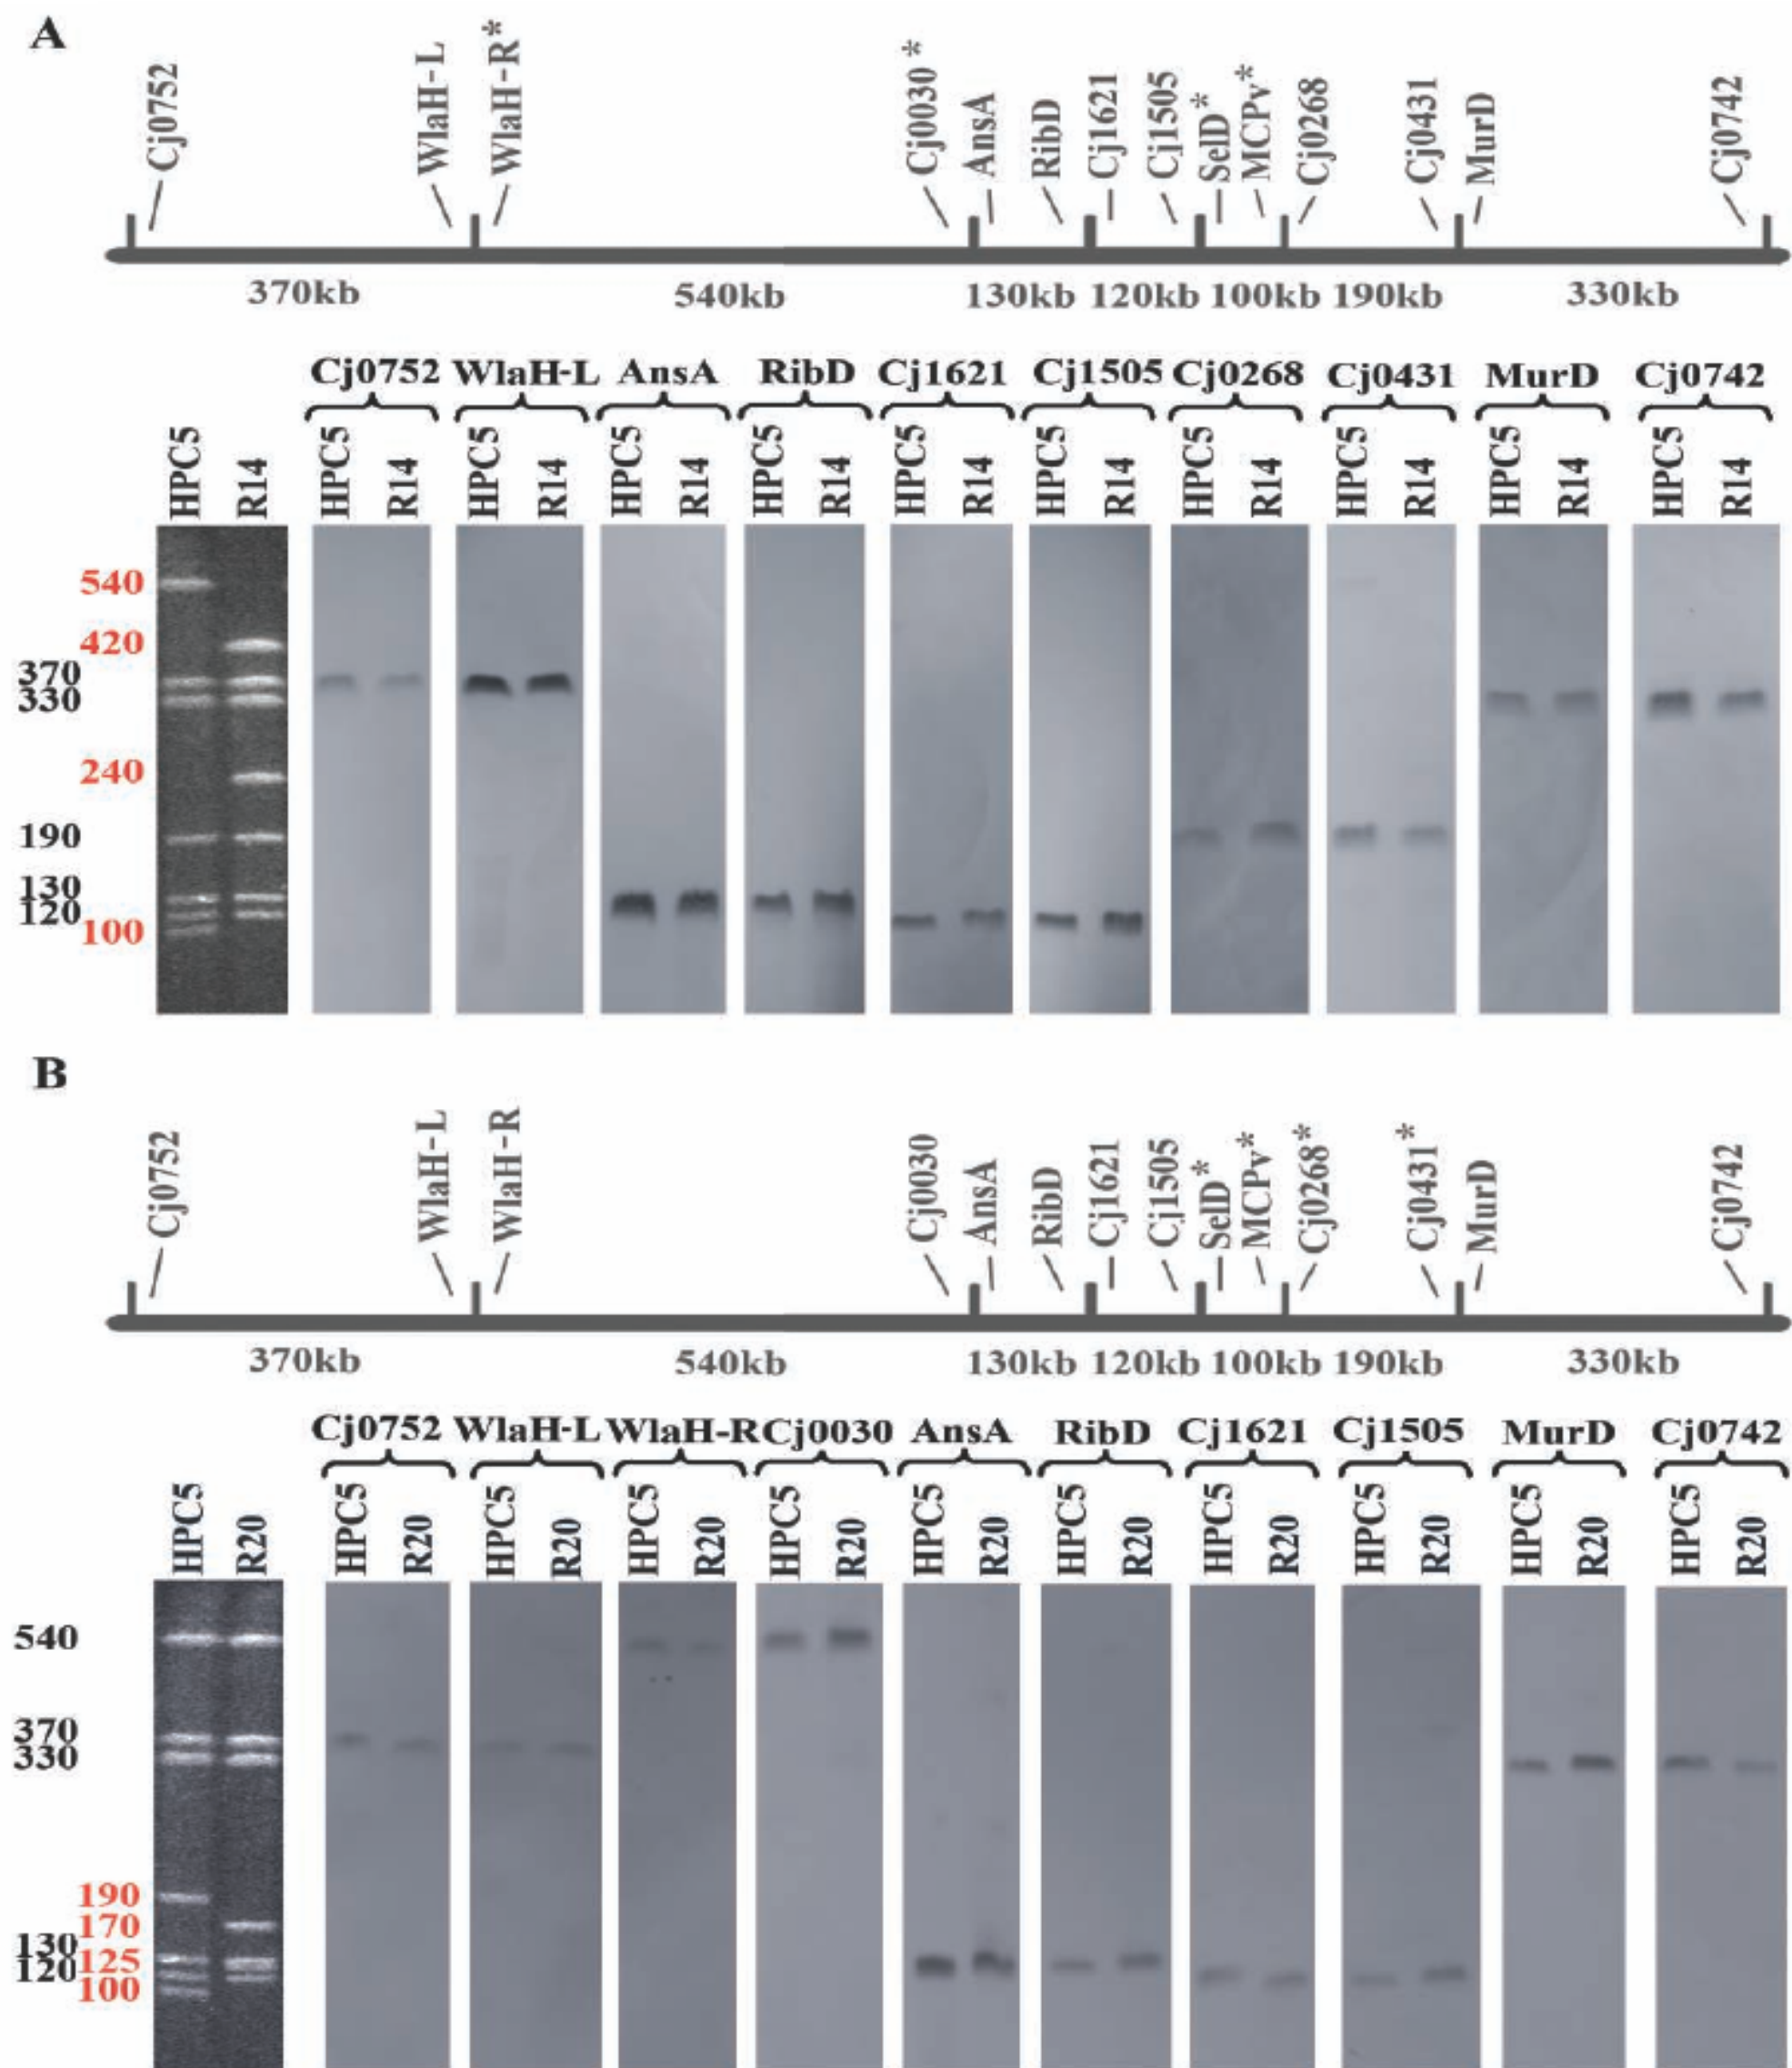

Supplement: ppat.0030119.sg001.pdf [file ppat.0030119.sg001.pdf]

Figure S2

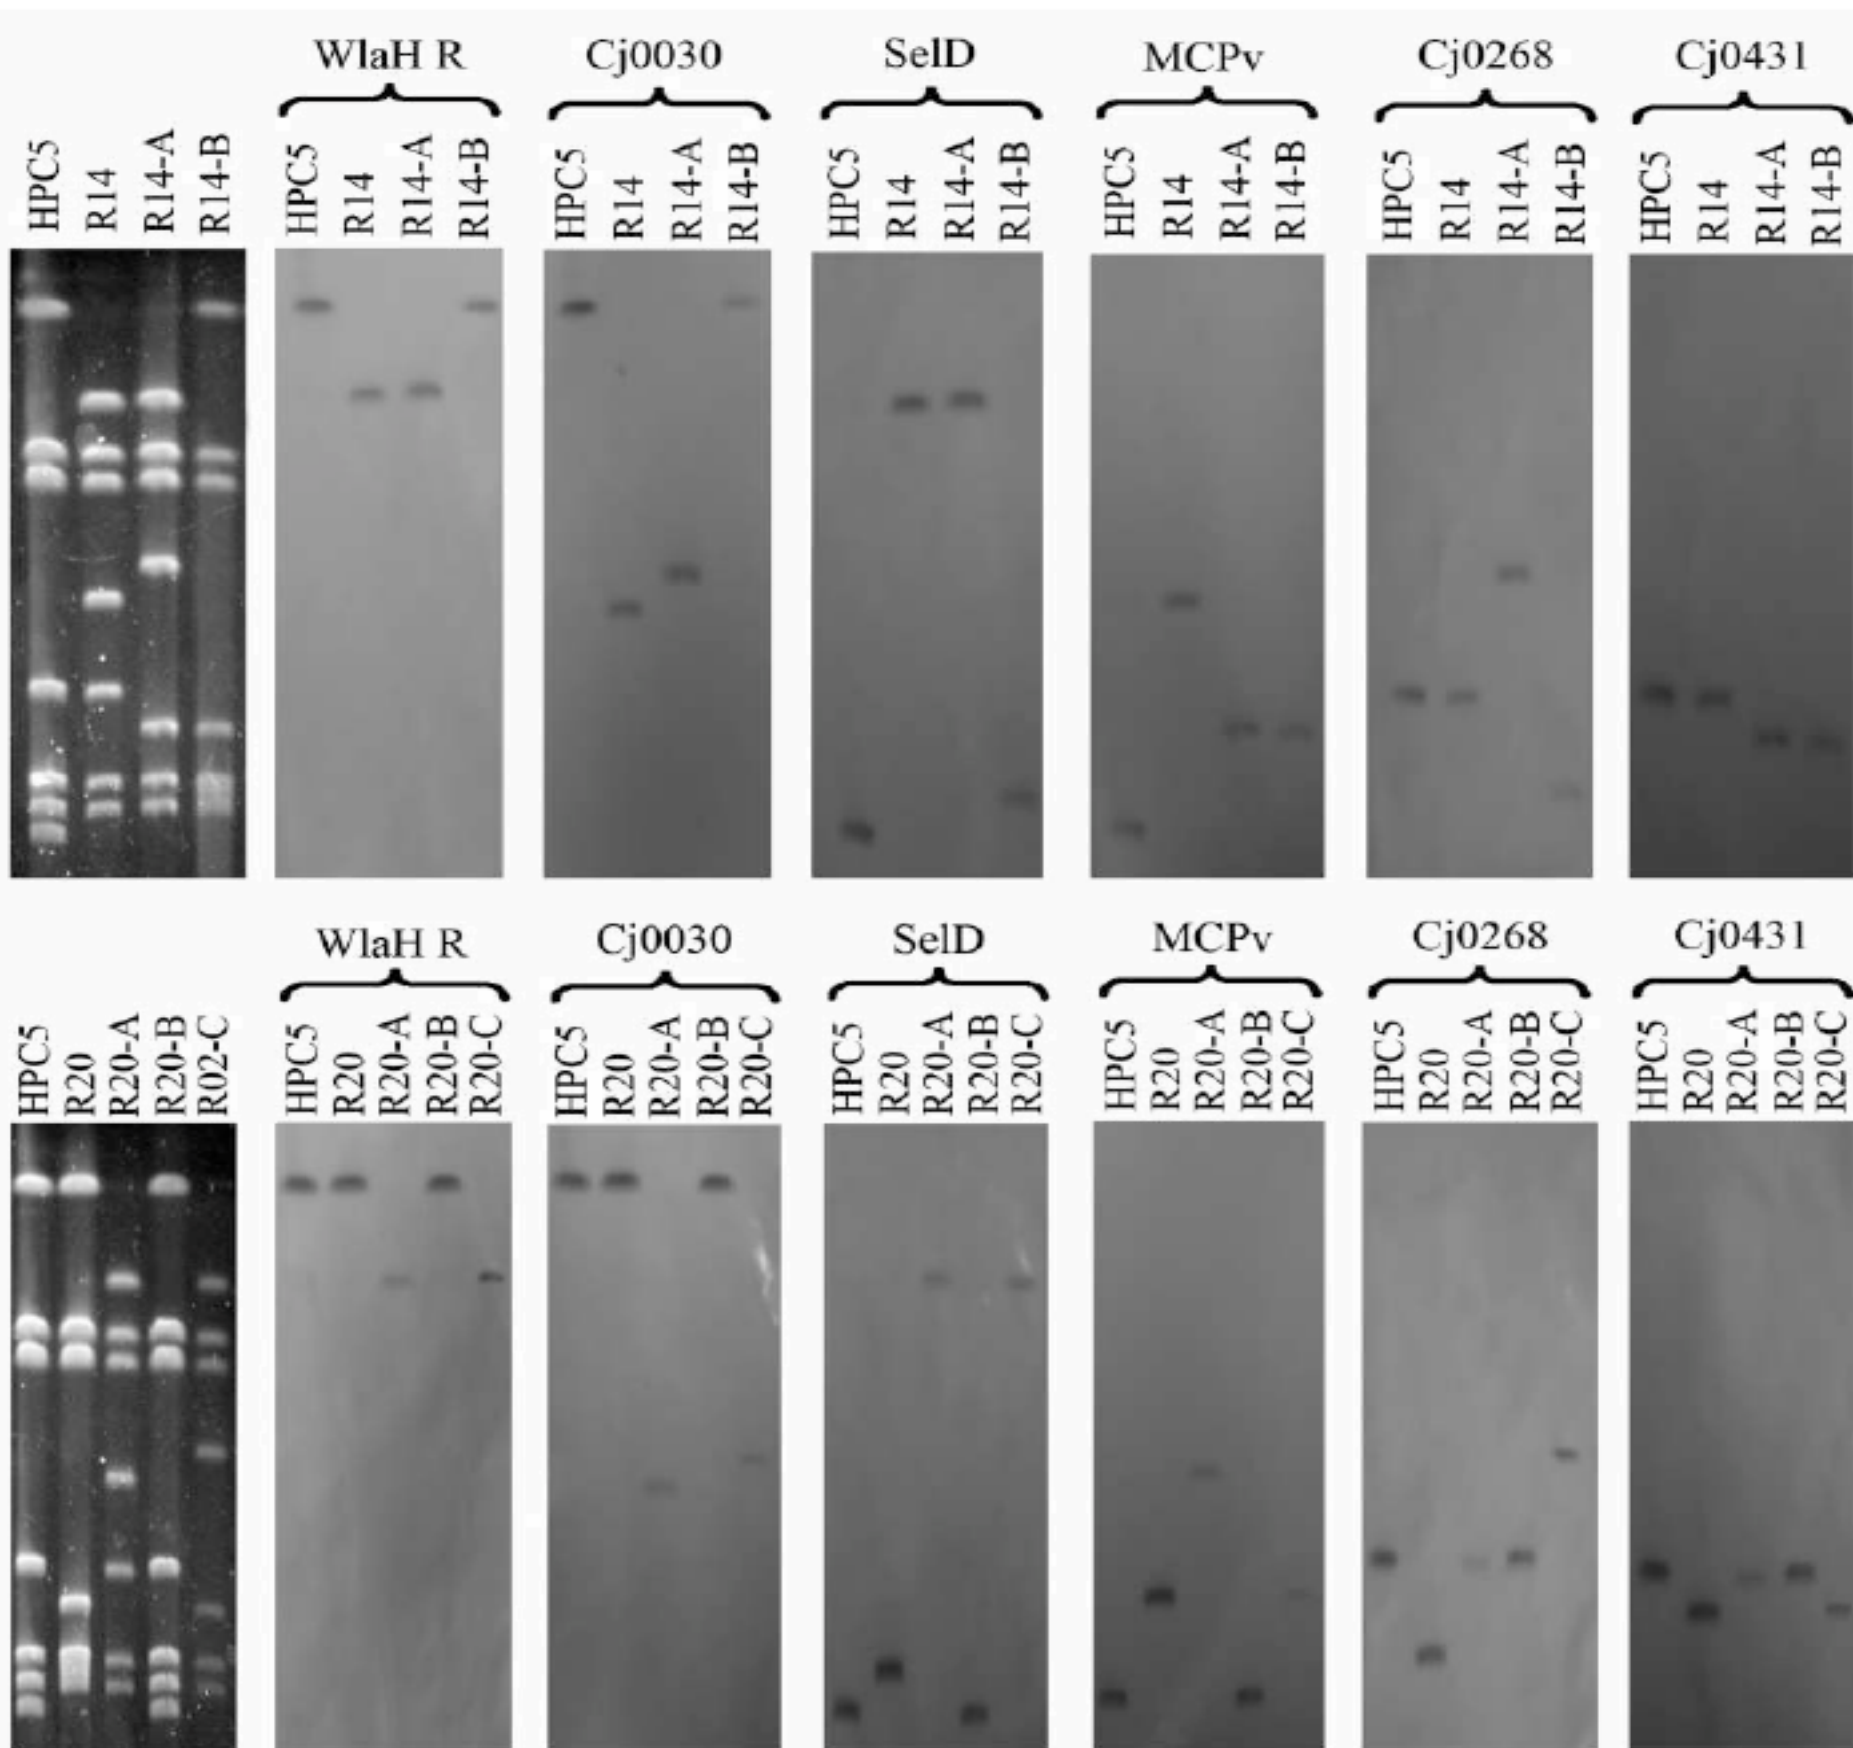

Supplement: ppat.0030119.sg002.pdf [file ppat.0030119.sg002.pdf]

Figure S9

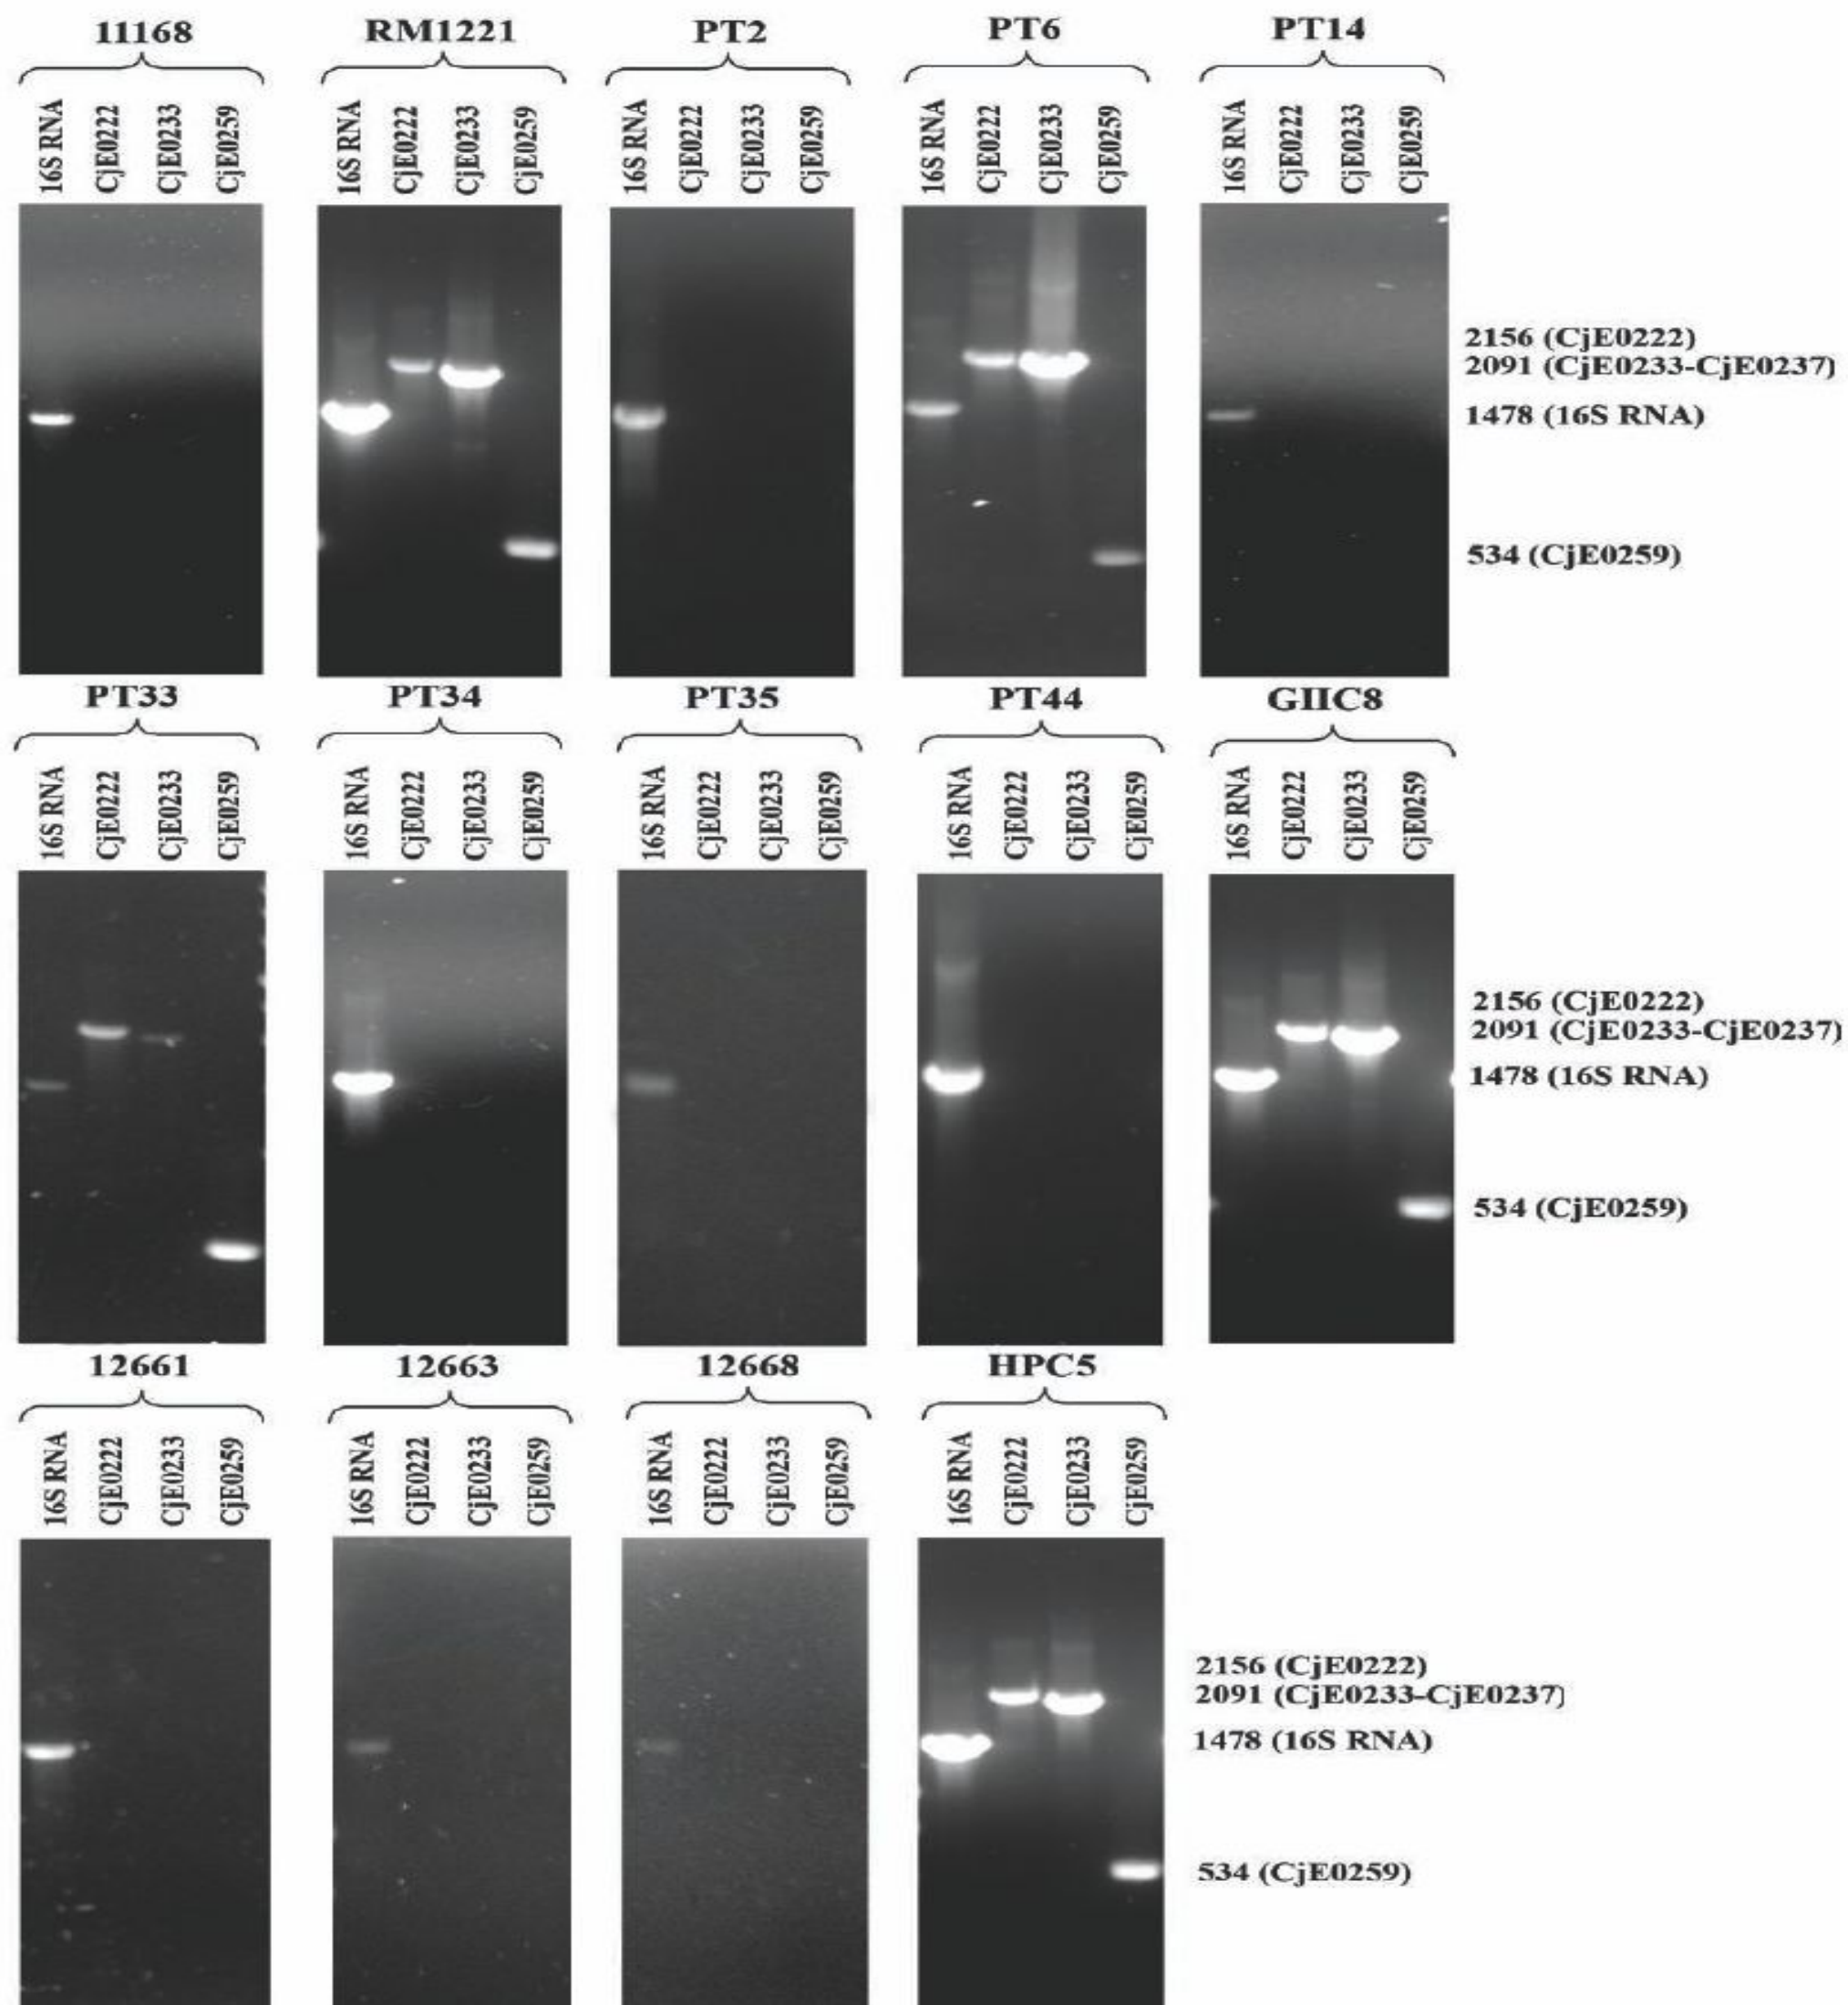

Supplement: ppat.0030119.sg009.pdf [file ppat.0030119.sg009.pdf]

Figure S10

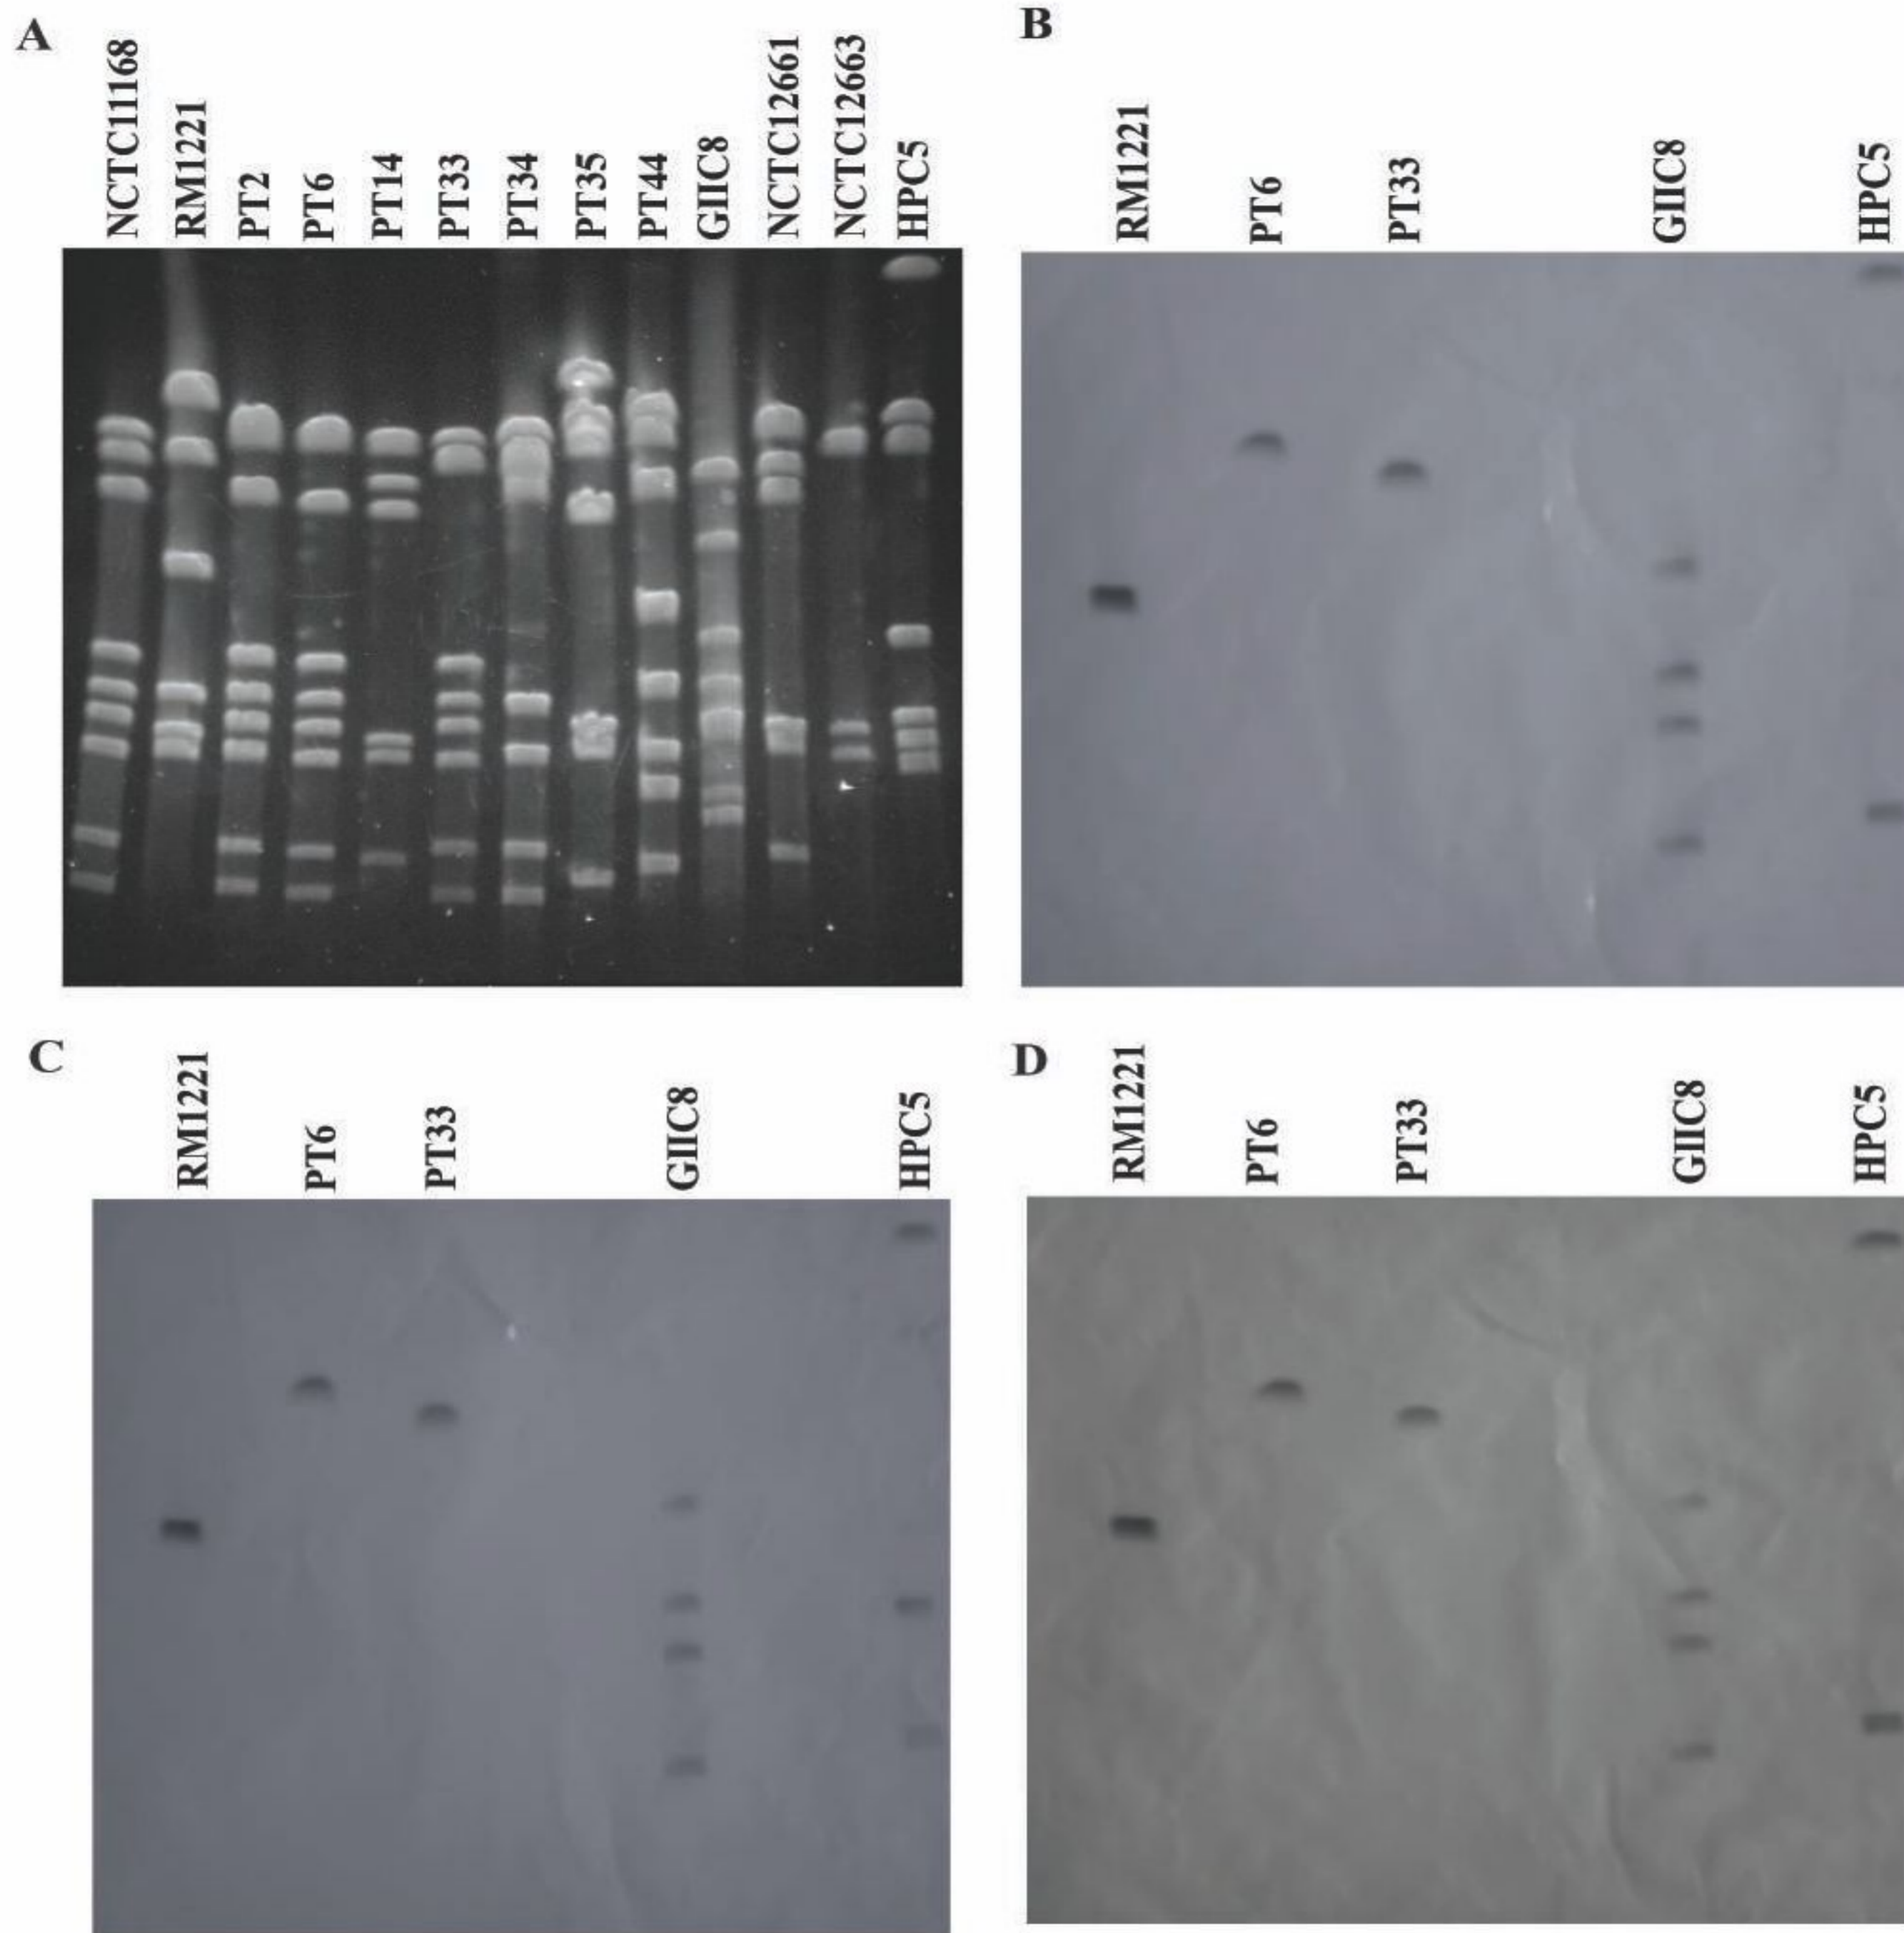

Supplement: ppat.0030119.sg010.pdf [file ppat.0030119.sg010.pdf]
